# Supplementary material
Source: PubMed Central journal article supplement (PMC3396447)
Supplement: supp_112.037770_ajcn037770-STable1-STable3_SFig_1.pdf [file supp_112.037770_ajcn037770-STable1-STable3_SFig_1.pdf]

Table S1 - Foods included on the estimation of SF from different sources in MESA<sup>1</sup>

| Dairy SF                                   | Meat SF                          |                   | Butter SF            | Plant SF      | Mixed animal and plant SF |
|--------------------------------------------|----------------------------------|-------------------|----------------------|---------------|---------------------------|
|                                            | Unprocessed meat                 | Processed meat    |                      |               |                           |
| Plain yogurt                               | Hamburger                        | Sausage           | Butter               | Nuts          | Fried fish                |
| Flavored yogurt                            | Beef, pork or lamb steak         | Ham hocks         | Butter on veg/potato | Peanuts       | Fried chicken             |
| Frozen yogurt                              | Enchilada with meat              | Ham               |                      | Pea soup      | Stir fried vegetables     |
| Sweet condensed milk                       | Oriental noodles                 | Liver             |                      | Margarine     | Tuna                      |
| Ice cream                                  | Picadillo                        | Chinese dumplings |                      | Lettuce salad | Pies                      |
| Cottage or ricotta cheese                  | Chile with meat                  |                   |                      | Spinach salad | Burritos                  |
| Milk 2%t                                   | Pasta tomato sauce with meat     |                   |                      | Avocado       | Chicken salad             |
| Skim milk                                  | Red chili with meat              |                   |                      |               | Other soup                |
| Whole milk                                 | Green chili with meat            |                   |                      |               | Fried rice                |
| Milk in coffee/tea                         | Meat stew                        |                   |                      |               | White bread               |
| Cream in coffee/tea                        | Burritos with meat               |                   |                      |               | Pancakes                  |
| Cheddar, American, Swiss, any other cheese | Stir fried beef, pork or chicken |                   |                      |               | Biscuits                  |
| Pasta cream sauce                          |                                  |                   |                      |               | Crackers                  |
| Cream soup                                 |                                  |                   |                      |               | French fries              |
| Pizza                                      |                                  |                   |                      |               | Chips                     |
| Hot cocoa                                  |                                  |                   |                      |               | White donuts              |
| Enchiladas w/o meat                        |                                  |                   |                      |               | Choc donuts               |
|                                            |                                  |                   |                      |               | Eggs                      |

<sup>1</sup> FFQ line items whose assignment was difficult to make concisely were included as ‘Mixed animal and plant SF’; the direction of associations for each of these component line items were anticipated to be mixed, but for completeness, were included in a single group rather than omitted from consideration.

SF: saturated fat

Table S2 - Hazards ratios (HR) and 95% CI of CHD according to quintiles of energy-adjusted saturated fat from different sources (N=5,209; 231 new cases)

|                            | HR (95% CI)<br>for each 5 g/day | <i>P</i> -value | HR (95% CI)<br>for each 5 %<br>energy | <i>P</i> -value |
|----------------------------|---------------------------------|-----------------|---------------------------------------|-----------------|
| <b>Total SF</b>            |                                 |                 |                                       |                 |
| Basic Model                | 0.98 (0.88,1.11)                | 0.79            | 0.94 (0.75,1.17)                      | 0.56            |
| Model 1                    | 0.94 (0.83,1.06)                | 0.25            | 0.85 (0.68,1.06)                      | 0.12            |
| Model 2                    | 0.86 (0.74,1.00)                | 0.05            | 0.73 (0.56,0.96)                      | 0.02            |
| <b>Dairy SF</b>            |                                 |                 |                                       |                 |
| Model 1                    | 0.94 (0.81,1.09)                | 0.38            | 0.88 (0.66,1.17)                      | 0.37            |
| Model 2                    | 0.91 (0.78,1.05)                | 0.18            | 1.16 (0.87,1.56)                      | 0.16            |
| Model 3                    | 0.84 (0.71,0.99)                | 0.03            | 0.71 (0.52,0.98)                      | 0.03            |
| <b>Meat SF</b>             |                                 |                 |                                       |                 |
| Model 1                    | 1.39 (1.13,1.72)                | <0.01           | 1.90 (1.23,2.93)                      | <0.01           |
| Model 2                    | 1.32 (1.07,1.64)                | 0.01            | 1.67 (1.07,2.60)                      | 0.03            |
| Model 3                    | 1.29 (1.03,1.62)                | 0.03            | 1.57 (0.98,2.51)                      | 0.06            |
| <b>Processed meat SF</b>   |                                 |                 |                                       |                 |
| Model 1                    | 1.25 (0.89,1.76)                | 0.20            | 1.52 (0.75,3.09)                      | 0.25            |
| Model 2                    | 1.19 (0.84,1.70)                | 0.35            | 1.28 (0.62,2.63)                      | 0.55            |
| Model 3                    | 1.12 (0.76,1.64)                | 0.59            | 1.10 (0.51,2.38)                      | 0.84            |
| <b>Unprocessed meat SF</b> |                                 |                 |                                       |                 |
| Model 1                    | 1.63 (1.22,2.17)                | <0.01           | 2.61 (1.47,4.62)                      | <0.01           |
| Model 2                    | 1.56 (1.15,2.10)                | <0.01           | 2.37 (1.29,4.35)                      | <0.01           |
| Model 3                    | 1.51 (1.12,2.05)                | <0.01           | 2.22 (1.20,4.08)                      | 0.01            |
| <b>Butter SF</b>           |                                 |                 |                                       |                 |
| Basic Model                | 0.85 (0.61,1.19)                | 0.34            | 0.77 (0.42,1.43)                      | 0.41            |
| Model 1                    | 0.80 (0.56,1.12)                | 0.19            | 0.68 (0.36,1.29)                      | 0.22            |
| Model 2                    | 0.79 (0.55,1.12)                | 0.18            | 0.67 (0.35,1.27)                      | 0.20            |
| <b>Plant SF</b>            |                                 |                 |                                       |                 |
| Basic Model                | 0.81 (0.39,1.69)                | 0.57            | 0.54 (0.14,2.02)                      | 0.36            |
| Model 1                    | 0.80 (0.38,1.69)                | 0.54            | 0.51 (0.13,1.96)                      | 0.32            |
| Model 2                    | 1.00 (0.44,2.25)                | 0.99            | 2.09 (0.19,23.04)                     | 0.63            |

| Mixed source SF |                  |      |                  |      |
|-----------------|------------------|------|------------------|------|
| Basic Model     | 0.96 (0.74,1.24) | 0.75 | 0.82 (0.50,1.33) | 0.42 |
| Model 1         | 0.91 (0.70,1.18) | 0.43 | 1.29 (1.17,1.43) | 0.22 |
| Model 2         | 0.90 (0.65,1.24) | 0.47 | 0.68 (0.38,1.24) | 0.19 |

SF: saturated fat

All values are HRs (95% CIs) derived from proportional hazards models adjusted as follows:

Model 1 included energy intake (kcal/day), age(y), sex, race-ethnicity (non-Hispanic Whites, African Americans, Hispanics and Chinese-Americans), and study center; model 2 included additional adjustment for education (<high school, high school, >high school), alcohol intake (g/day), physical activity (active and sedentary leisure in metabolic equivalents per min/wk), BMI (kg/m<sup>2</sup>), cigarette smoking (never, current or former smoker and pack-year of cigarette smoking ), dietary supplement use (>1/week, yes or no), use of cholesterol lowering medication (yes/no); model 3 included all variables in model 2 plus intakes of fruits and vegetables (servings/day), energy-adjusted intakes of dietary fiber (g/day), dietary vitamin E (IU/day), trans fat and PUFA (g/day).

P-trend was calculated by using median values of energy-adjusted nutrient quintiles as continuous variables in the statistical models.

Table S3 - HRs and 95% CIs for the replacement of 2% percent of energy from SF from different food sources in MESA (N=5,209; 231 new cases)

| CHD                                  | Model 2<br>HR (95% CI) |
|--------------------------------------|------------------------|
| Dairy SF in replacement of meat SF   | 0.76 (0.61,0.94)       |
| Butter SF in replacement of meat SF  | 0.71 (0.53,0.95)       |
| Plant SF in replacement of meat SF   | 0.62 (0.35,1.11)       |
| Butter SF in replacement of dairy SF | 0.94 (0.72,1.22)       |
| Plant SF in replacement of dairy SF  | 0.82 (0.48,1.42)       |
| Plant SF in replacement of butter SF | 0.88 (0.50,1.55)       |

SF: saturated fat

All values are HRs (95% CIs) derived from proportional hazards models adjusting for energy intake (kcal/day), age(y), sex, race-ethnicity (non-Hispanic Whites, African Americans, Hispanics and Chinese-Americans), study center, education (<high school, high school, >high school), alcohol intake (g/day), physical activity (active and sedentary leisure in metabolic equivalents per min/wk), BMI (kg/m<sup>2</sup>), cigarette smoking (never, current or former smoker and pack-year of cigarette smoking ), dietary supplement use (>1/week, yes or no) and use of cholesterol lowering medication (yes/no).

Supplemental Figure 1: HR and 95% CI for each serving/day of selected dairy sources

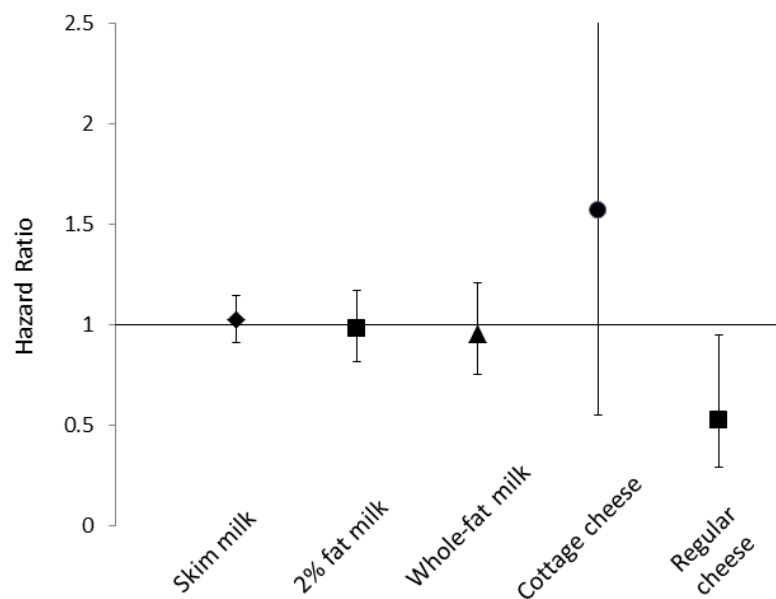

HRs and 95% CI derived from proportional hazards models adjusted for age, sex, race-ethnicity, study center, energy intake, education, alcohol intake, physical activity, BMI, cigarette smoking status, dietary supplement use, cholesterol lowering medication use, intakes of fruits and vegetables (servings/day), dietary fiber (g/day), dietary vitamin E (IU/day), trans fat and PUFA (g/day).

Milk variable captures beverages made with milk including cafe latte and café au lait.

Other cheese include Cheddar, American, Chihuahua, Swiss, cream cheese, cheese spreads, any other whole-fat cheese
